# Supplementary material for: A note on the duration of claystone exploration programs
Source: Copernicus journal article supplement (doi:10.5194/sand-2-53-2023), 2023-09-06
Supplement: Supplementary file 1 [file sand-2-53-2023-supplement.pdf]

Supplement of Saf. Nucl. Waste Disposal, 2, 53–53, 2023  
<https://doi.org/10.5194/sand-2-53-2023-supplement>  
© Author(s) 2023. CC BY 4.0 License.

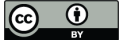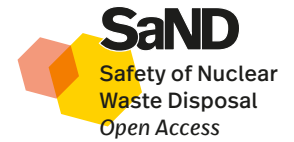

*Supplement of*

## **A note on the duration of claystone exploration programs**

**Thomas Mann et al.**

*Correspondence to:* Thomas Mann (thomas.mann@bgr.de)

The copyright of individual parts of the supplement might differ from the article licence.

# A note on the duration of claystone exploration programs

**SafeND 2023 | Berlin 13 -15 September 2023**

Thomas Mann, Bernhard Schuck, Tilo Kneuker,  
Lukas Pollok, André Bornemann, and Jochen Erbacher

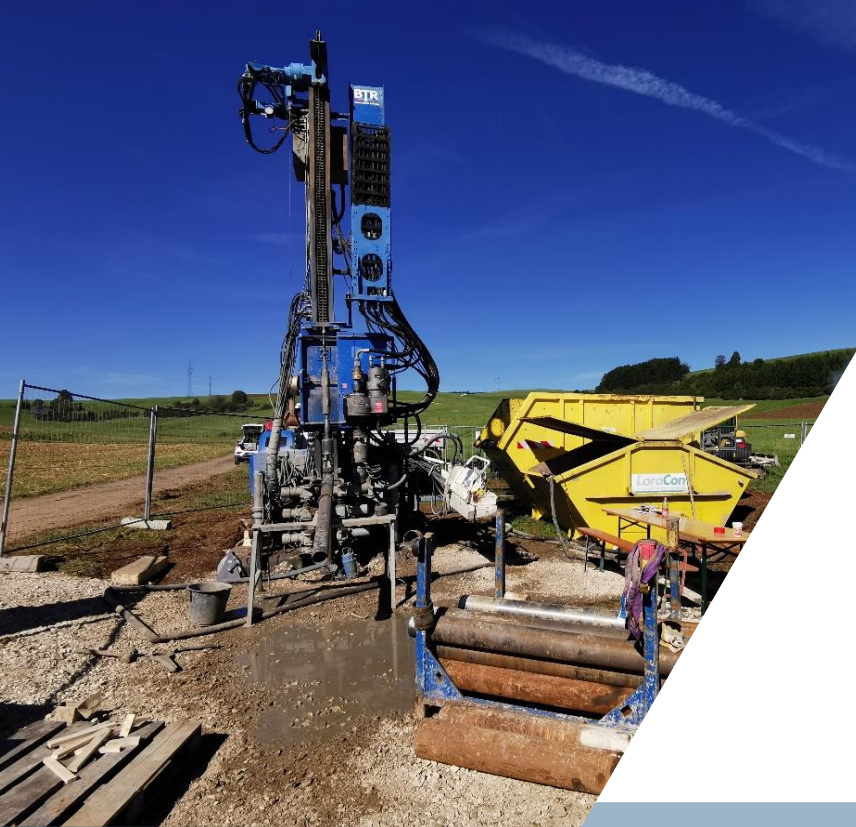

14.09.2023

# Claystone sub-areas in Germany

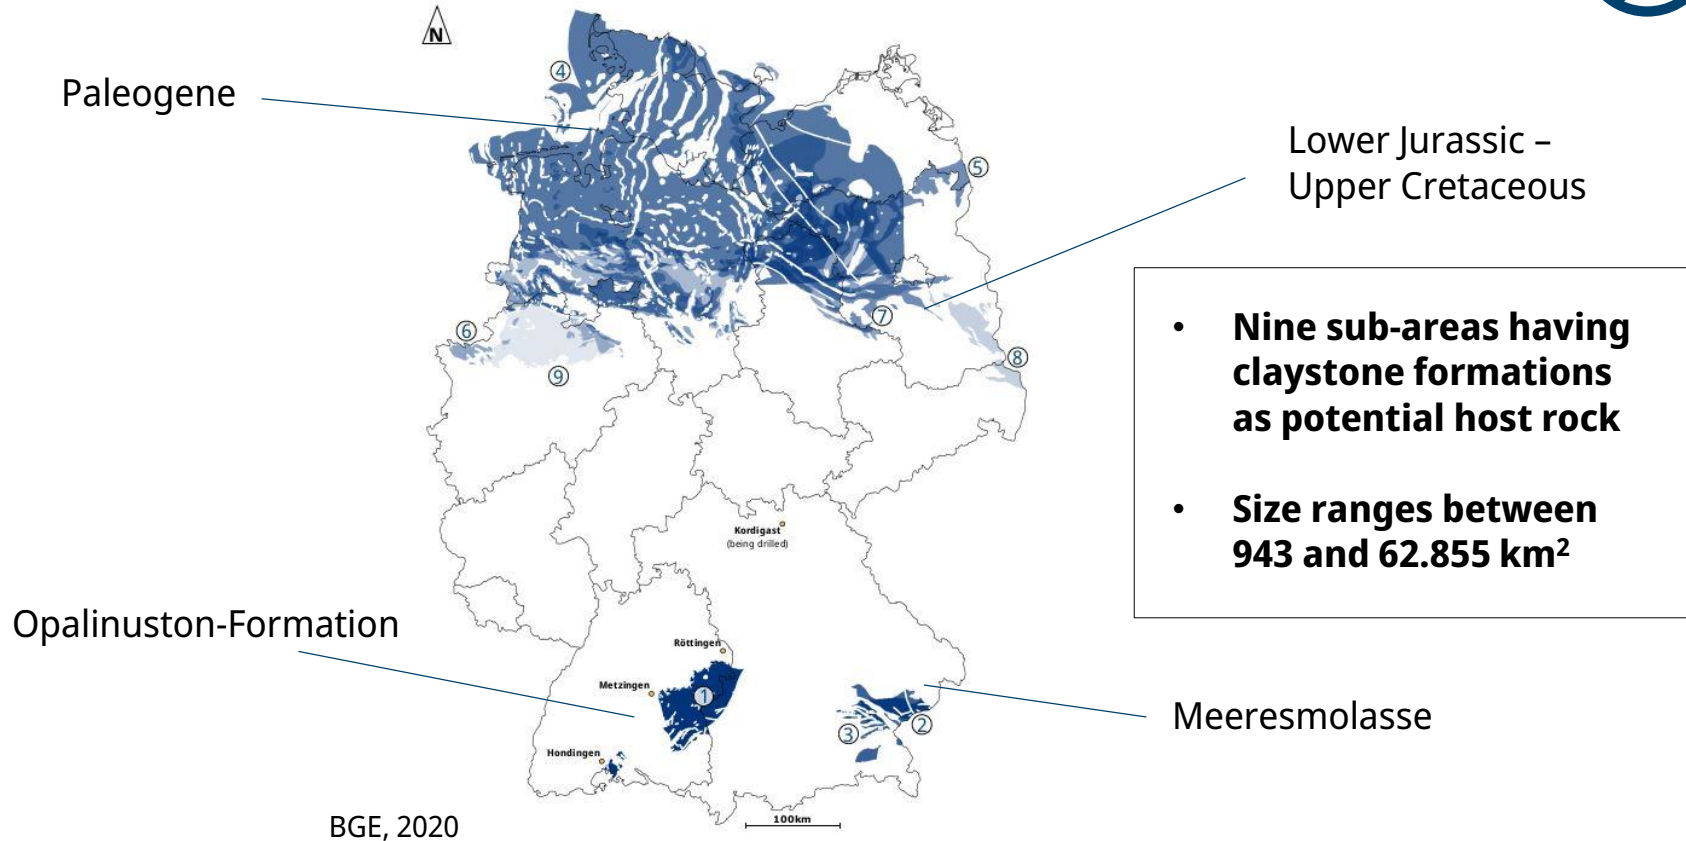

# Probable duration of the site selection procedure



BUNDESGESELLSCHAFT  
FÜR ENDLAGERUNG

Zeitliche Betrachtung des  
Standortauswahlverfahrens aus Sicht der BGE  
Rahmenterminplanung für Schritt 2 der Phase I bis zum  
Vorschlag der Standortregionen und zeitliche  
Abschätzungen für Phase II und III

Stand 16.12.2022

BGE, 2022a

## Identification of siting regions for surface exploration

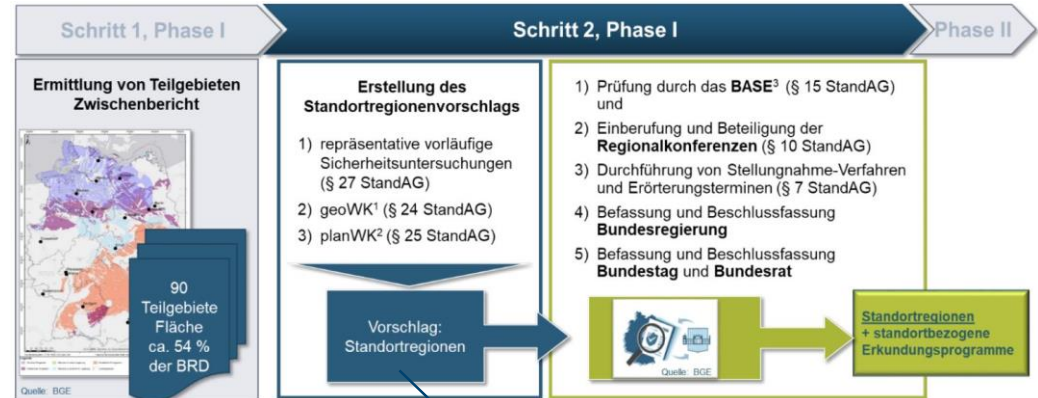

BGE, 2022b

Planned for 2027

# Estimated duration of surface exploration activities within each siting region

Table 3 in BGE, 2022a

| Arbeitsschritt                                                                                                                                                                                                                                                                                                                                                                                                                                                                        |
|---------------------------------------------------------------------------------------------------------------------------------------------------------------------------------------------------------------------------------------------------------------------------------------------------------------------------------------------------------------------------------------------------------------------------------------------------------------------------------------|
| 3D-Seismik: Auswertung <ul style="list-style-type: none"><li>• Zeitprocessing</li><li>• Interpretation</li><li>• Ermittlung von Bohransatzpunkt(en)</li></ul>                                                                                                                                                                                                                                                                                                                         |
| Vorbereitung und Durchführung von Bohrungen inkl. Genehmigungen in den Standortregionen <ul style="list-style-type: none"><li>• Bergrechtliche Genehmigung und Permitting</li><li>• Bohrung A, Bohrung B, Bohrung C jeweils mit Bohrplatzeinrichtung, Drilling, Bohrlochgeophysik, Bohrkernansprache, lithologische und stratigraphische Auswertung, VSP-Messung, Gebirgsmechanische und hydraulische Tests, Einrichtung des Langzeitmonitorings, Rückbau und Renaturierung</li></ul> |
| Laboruntersuchungen im Rahmen der Bohrungen <ul style="list-style-type: none"><li>• Gesteinsmechanische Untersuchungen</li><li>• Hydraulische Untersuchungen</li><li>• Mineralogische Untersuchungen</li><li>• Geochemische Untersuchungen</li></ul>                                                                                                                                                                                                                                  |

## Field / Lab work

- Permissions
- Preparation of drill sites
- Three drillings (each 1000 m)
- Lithological and stratigraphical analyses

31 months

## Lab work

- Geomechanical & hydraulical rock properties
- Geochemical-mineralogical characterization

11 months

# Characterization of claystone successions

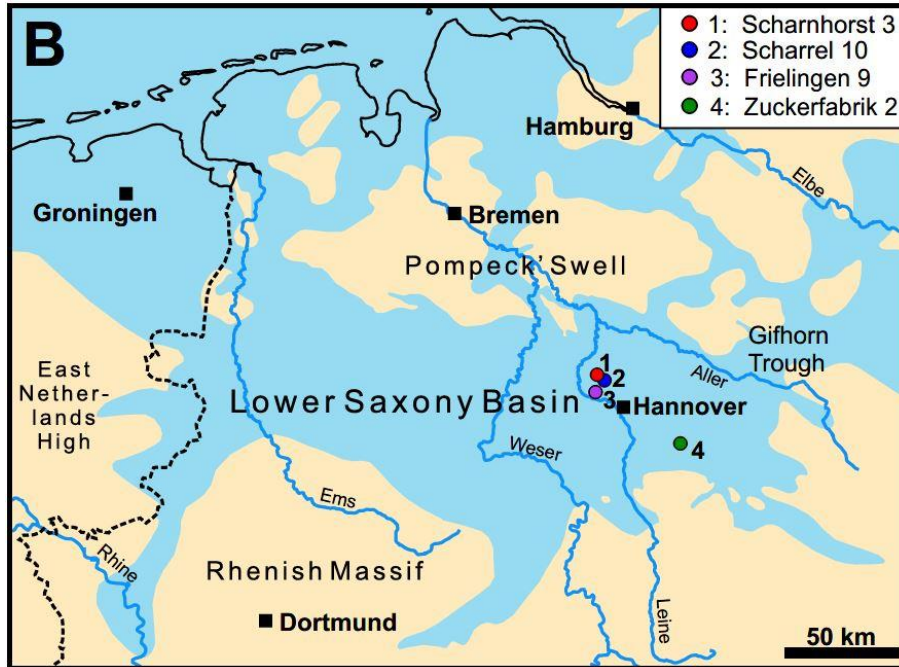

Thöle et al. 2020

Experiences from two recent case studies that developed sequence stratigraphic frameworks

## 1. Lower Cretaceous in northern Germany

- Four drill cores (Scharnhorst, Scharrel, Frielingen, Zuckerfabrik) with a **total length of 660 m**

# Characterization of claystone successions

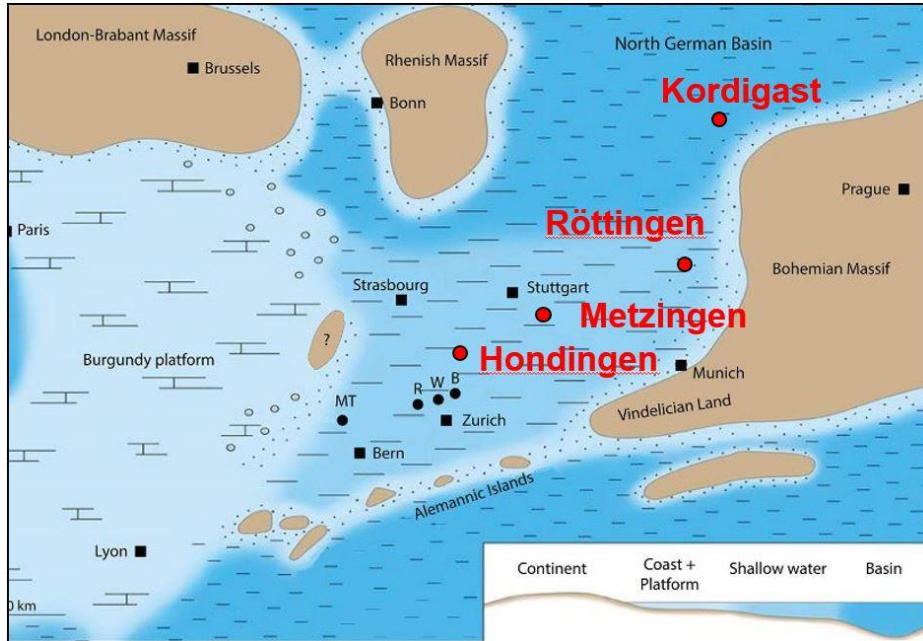

Lauper et al. 2021

Experiences from two recent case studies that developed sequence stratigraphic frameworks

## 2. Middle Jurassic in southern Germany

- Four drill cores (Metzingen, Röttingen, Hondingen, Kordigast) with a **total length of 930 m**

# Temporal commitment

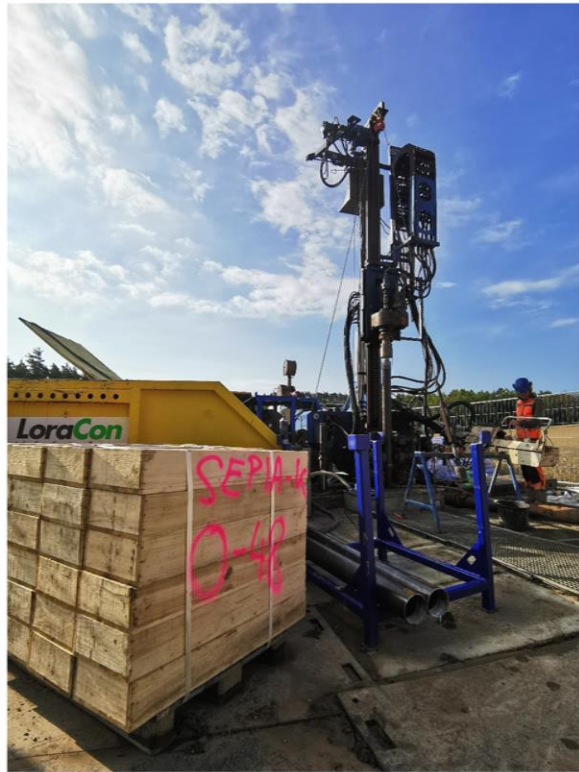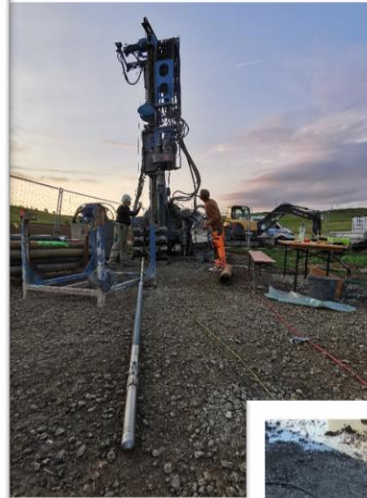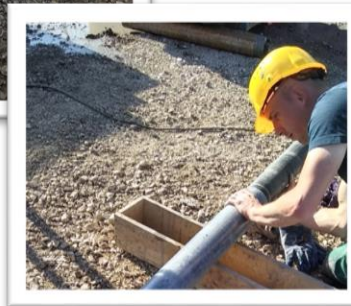

## Drilling

- Preparation of drill site
- Retrieval of 1.5 m / 3 m core sections
- Tentative lithological and lithostratigraphic description
- Hydraulical tests
- Sampling for noble gas analyses
- Logging

4-6  
months

42 months



# Temporal commitment

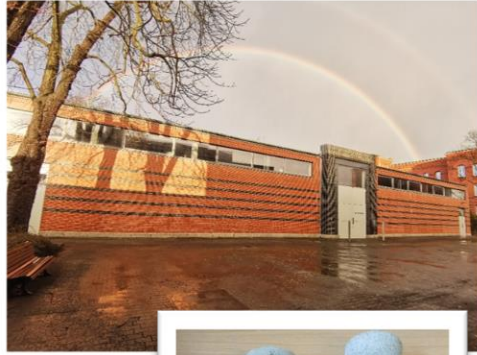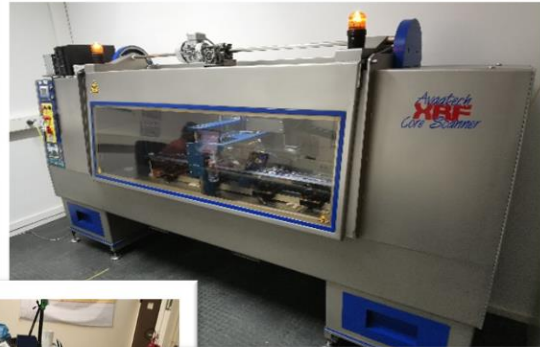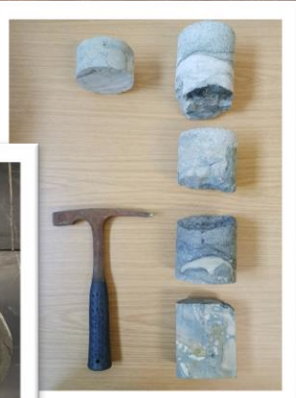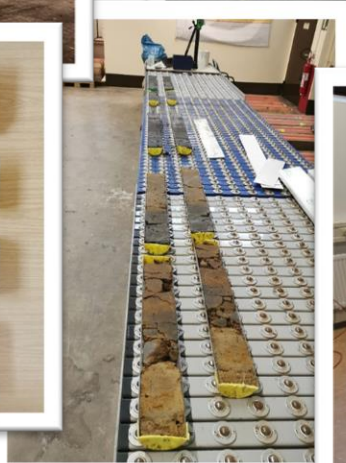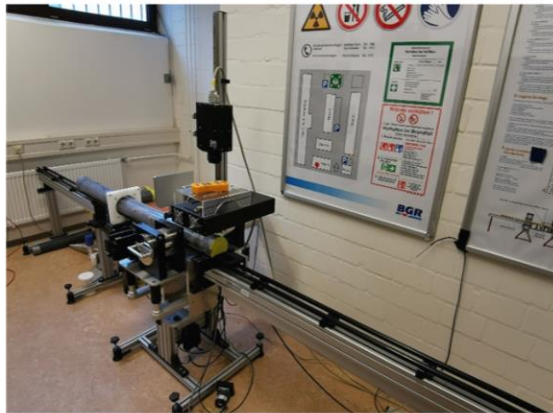

## Core related works

- Detailed lithological and lithostratigraphic description
- Scanning (Multi-Sensor Core Logger & X-ray Fluorescence Core Scanner)
- Sampling for lithological and stratigraphical analyses

8-12  
months

42 months

# Temporal commitment

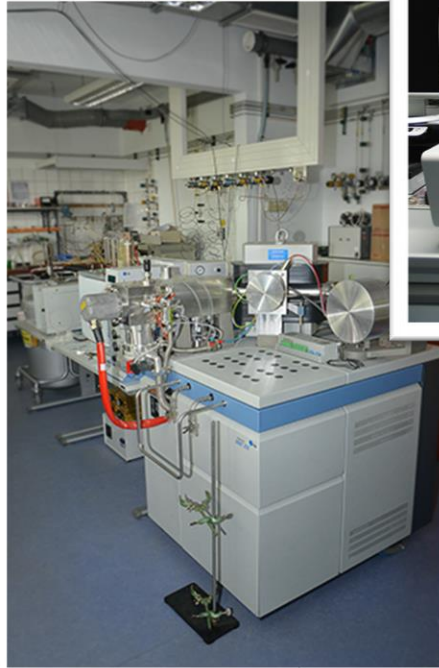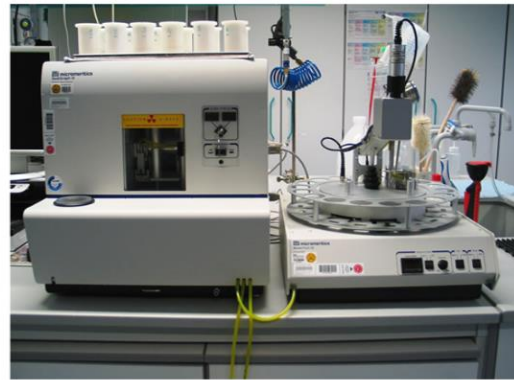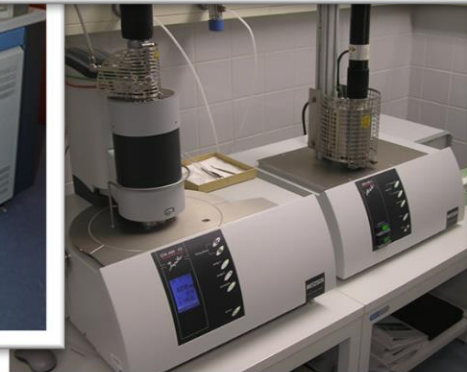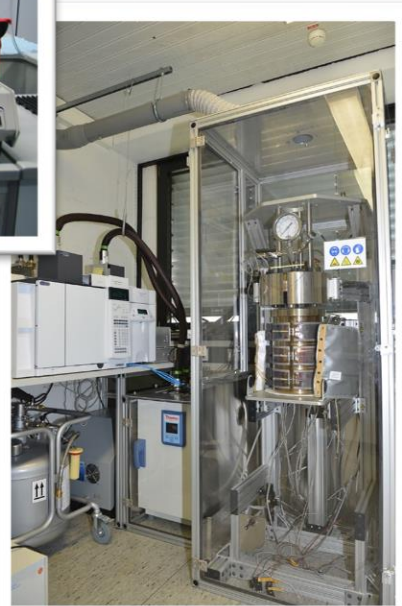

## Laboratory works

- Geochemistry and mineralogy
- Grain size
- Porosity
- CEC
- Thin & polished sections

24  
months

42 months

# Discussion

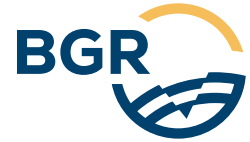

|                 |                   |                 |
|-----------------|-------------------|-----------------|
| <b>Drilling</b> | <b>Core works</b> | <b>Lab work</b> |
| 6 months        | 12 months         | 24 months       |

## Field / Lab work

- Permissions
- Preparation of drill sites
- Three drillings (each 1000 m)
- Lithological and stratigraphical analyses

**31**  
months

## Lab work

- Geomechanical & hydraulical rock properties
- Geochemical-mineralogical characterization

**11**  
months

# Hondingen

# Metzingen

# Legend

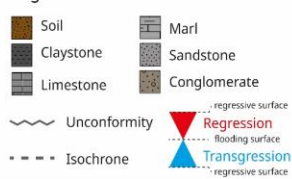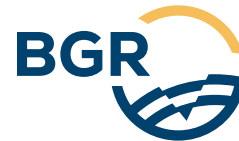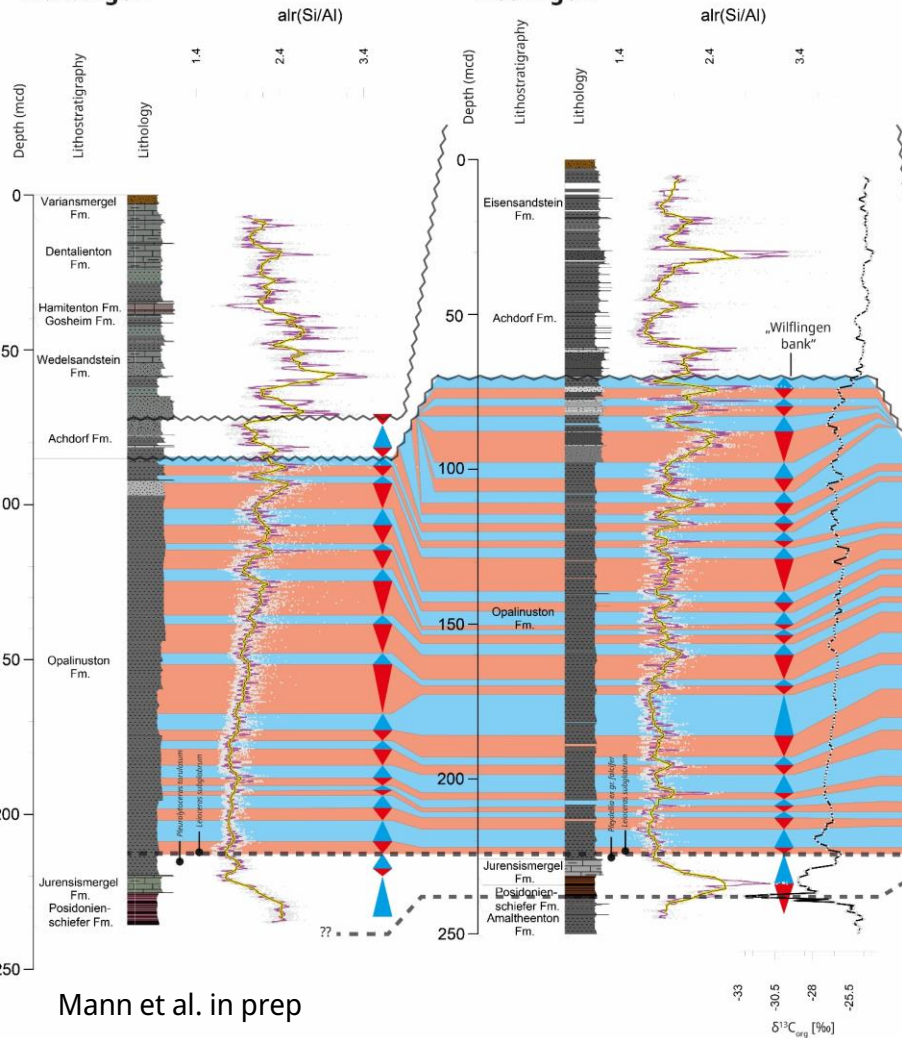

# Röttingen

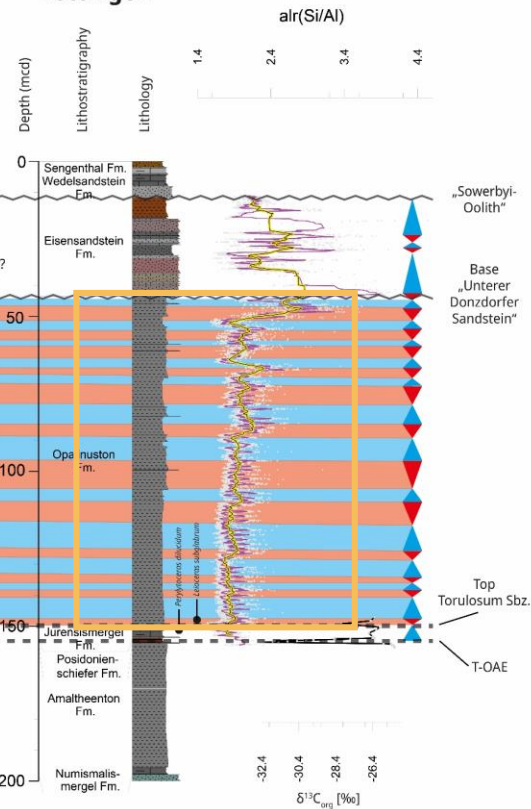

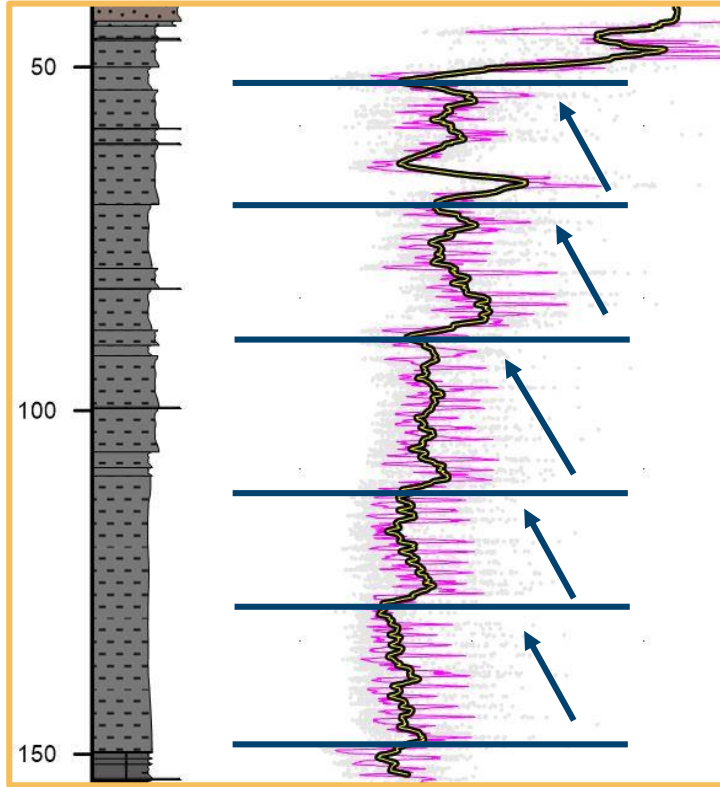

Mann et al. in prep

## Distinct cyclicity in XRF Si/Al ratio

- Five fining-upward cycles with sharp boundaries
- Probably related to the variability of orbital parameters
- Effect on the **quality of the barrier?**

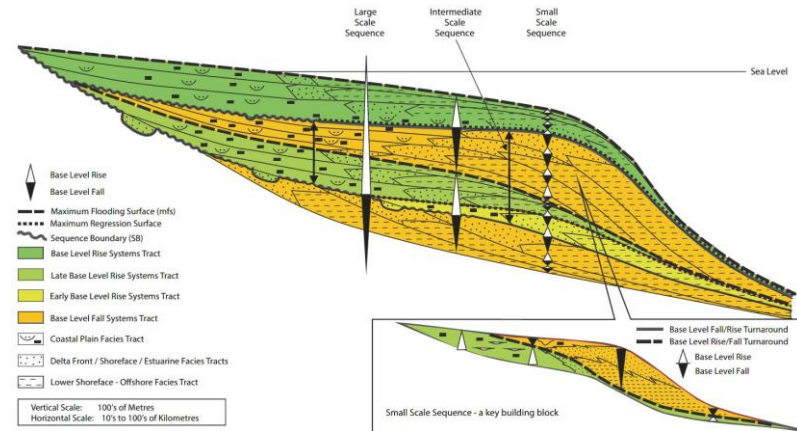

Schäfer 2019

# Summary & conclusions



- BGE estimates that the **duration of surface exploration activities within each siting region takes ~ 42 months**
  - Proposed sites for underground exploration
- **In accordance to the field and analytical workload from two recent BGR research projects, however:**
  - **Only realistic if sampling resolution is lowered**
  - **Not finished with data interpretation** (i.e. „derivation of the exploration and research requirements“ according to § 12 EndlSiUntV)
  - A **solid understanding of the depositional system** enables:
    - **Predictability of facies variations**
    - **Focussed exploration**
    - **Accelerated identification of appropriate sites for underground exploration**

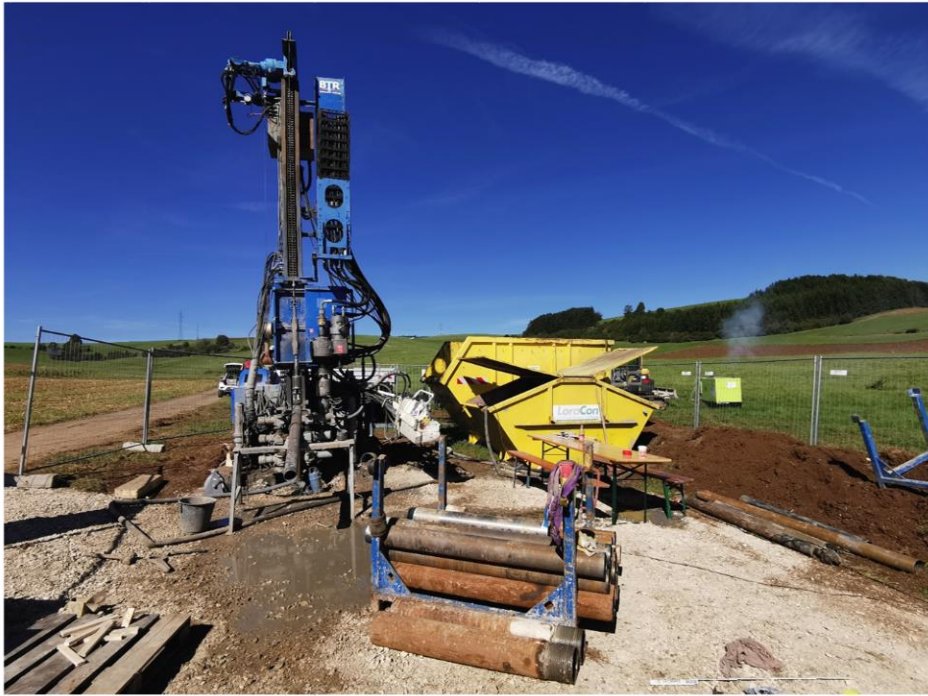

**Thanks for the attention!**

Thomas Mann, Bernhard Schuck, Tilo Kneuker,  
Lukas Pollok, André Bornemann, and Jochen Erbacher

Bundesanstalt für Geowissenschaften und Rohstoffe (BGR), Hannover, Germany
